# Supplementary material for: A low-loss optical waveguide from a 1D europium nanocluster
Source: Royal Society of Chemistry journal article supplement (doi:10.1039/d5qi02356d), 2026-01-01
Supplement: d5qi02356d1.pdf [file d5qi02356d1.pdf]

## ***Supporting information***

### **Low-loss Optical Waveguide from 1D Europium Nanocluster**

Jingjing Xia,<sup>a,‡</sup> Weinan Dong,<sup>a‡</sup> Shengrong He,<sup>a</sup> Feng Jiang,<sup>a,\*</sup> Wenming Tian,<sup>b,\*</sup> Qi Sun,<sup>b</sup> Meixin Hong,<sup>a</sup> Lingchen Meng,<sup>a</sup> Yu Zhang,<sup>a</sup> Zhennan Wu,<sup>a,\*</sup> Tingting Li,<sup>c,\*</sup> Xue Bai,<sup>a,\*</sup>

<sup>a</sup>State Key Laboratory of Integrated Optoelectronics, JLU Region, College of Electronic Science and Engineering, Jilin University, 2699 Qianjin Street, Changchun, 130012, P. R. China.

<sup>b</sup>State Key Laboratory of Molecular Reaction Dynamics, Dalian Institute of Chemical Physics, Chinese Academy of Sciences, 457 Zhong Shan Road, Dalian 116023, P. R. China.

<sup>c</sup>College of Materials Science and Engineering, Jilin Jianzhu University, Changchun 130012, P. R. China

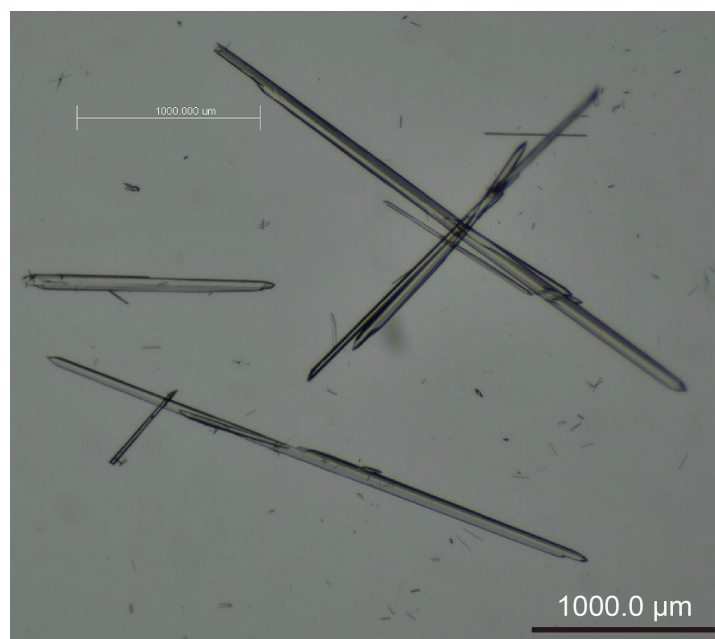

**Figure S1.** Crystal morphology: Needle-rod-like macroscopic morphology of Eu-NC under optical microscope.

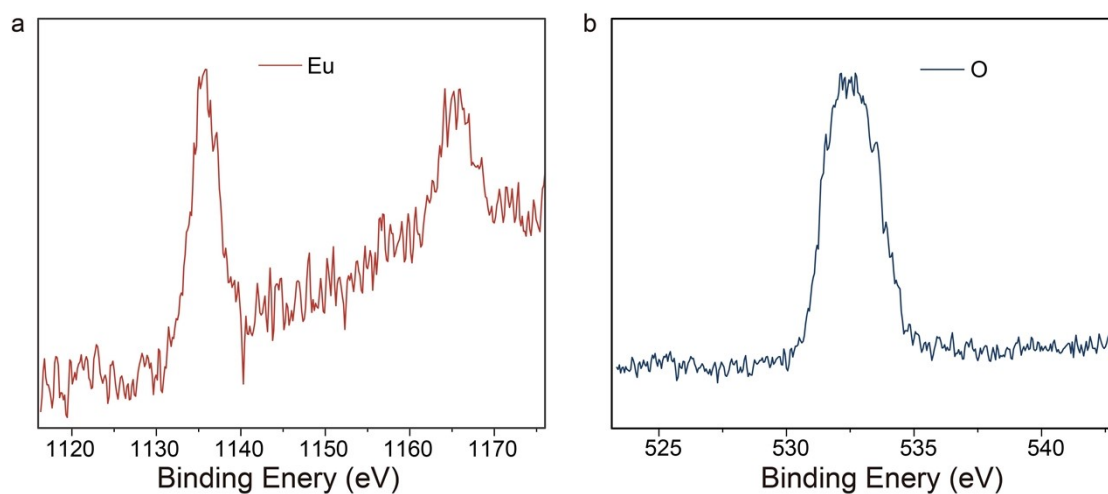

**Figure S2.** The X-ray photoelectron spectroscopy of Eu-NC. The binding energy peaks at 1130-1170 eV corresponding to  $\text{Eu}^{3+}$  (a) and 529-535 eV corresponding to  $\text{O}^{2-}$  (b) respectively.

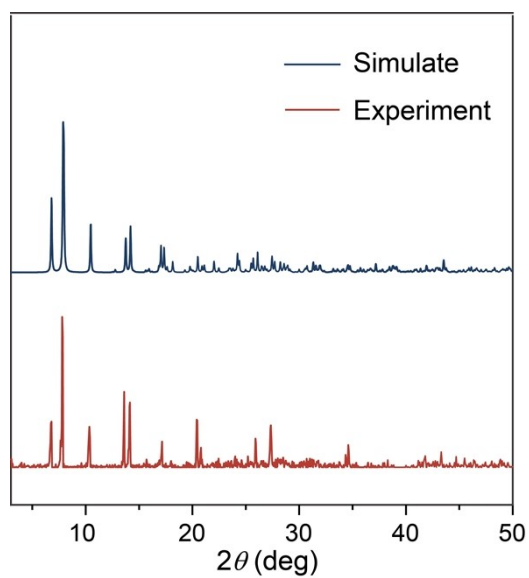

**Figure S3.** Powder X-ray diffraction pattern (PXRD) for Eu-NC. The PXRD of the crystal is well indexed to the standard card of Eu-NC, indicating the formation of high-purity solid without any impurity phases.

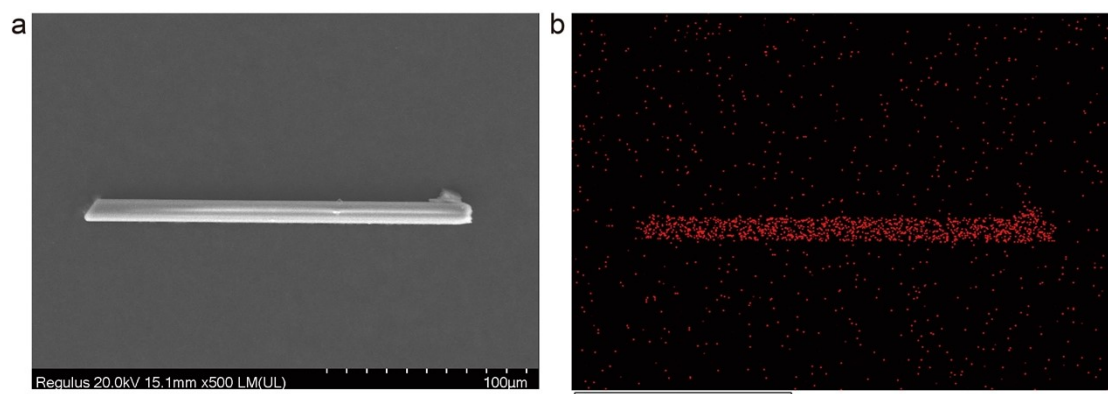

**Figure S4.** Scanning Electron Microscope Testing: (a) SEM image of the as-prepared Eu-NC. (b) EDX mapping of Eu-NC.

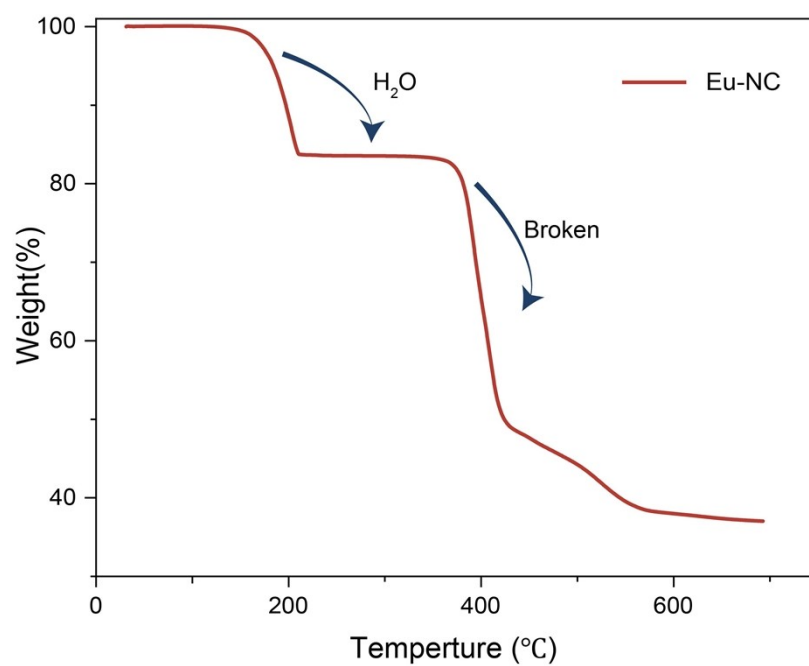

**Figure S5.** The TGA curves of Eu-NC under nitrogen-containing conditions.

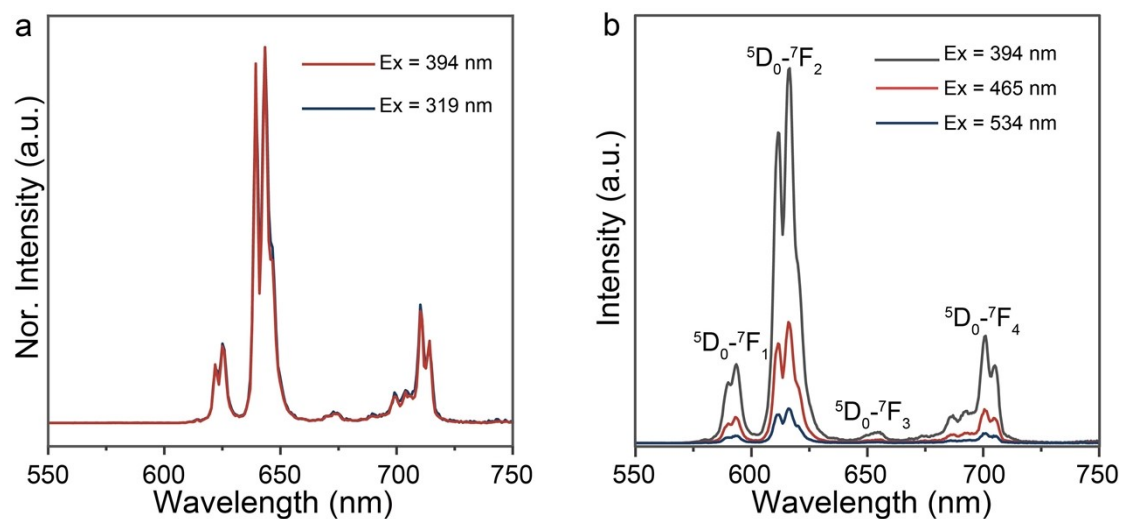

**Figure S6.** Variable-excitation emission spectrum. (a) Normalized emission spectra of Eu-NC upon ligand-directed excitation (319 nm) and  $\text{Eu}^{3+}$  intrinsic excitation (394 nm) under ambient conditions. (b) Emission spectra of Eu-NC under different intrinsic excitations.

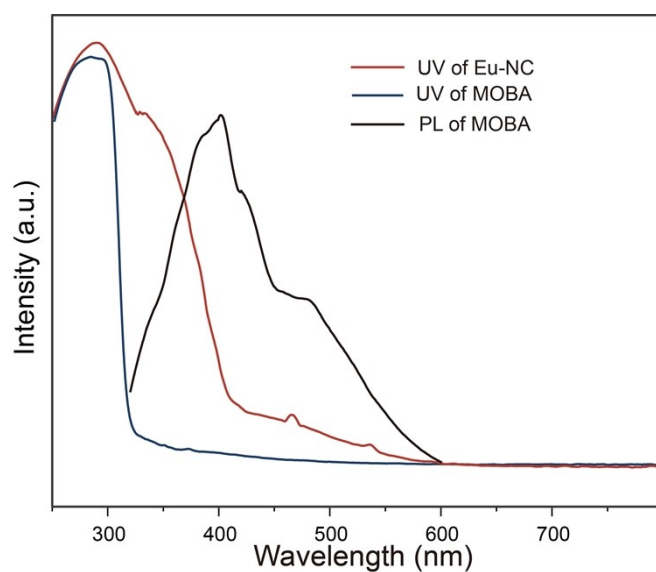

**Figure S7.** Solid-state UV-VIS spectra of Eu-NC (red line) and MOBA (blue line) at room temperature; emission spectra of MOBA (black line) at room temperature. The absorption peak of Eu-NC completely overlaps with that of MOBA and exhibits the characteristic absorption peak of  $\text{Eu}^{3+}$ ; the emission peak of MOBA is around 412 nm.



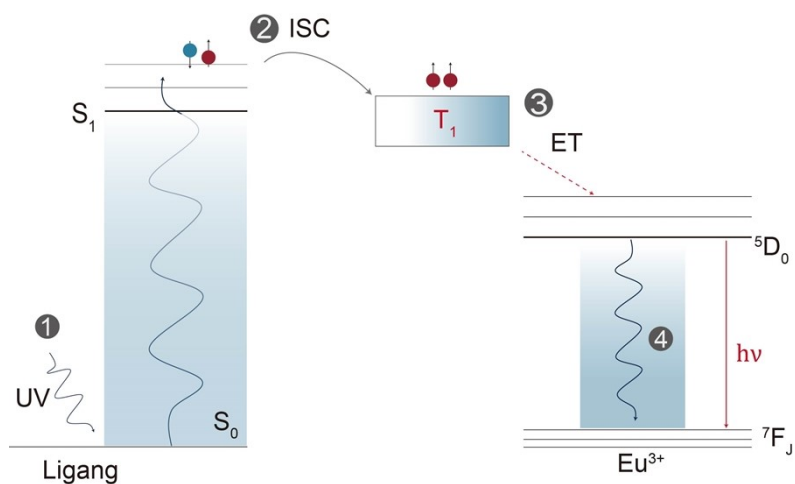

**Figure S8.** The process of intramolecular energy transfer from the ligands to  $\text{Eu}^{3+}$  centers. **1.** represents the process of ultraviolet light excitation of ligands, the electron transitions from the ground state  $S_0$  of the ligand to the first excited singlet state  $S_1$ , **2.** indicates the transfer of electrons to the triplet state via intersystem crossing (ISC), **3.** represents the transfer of energy to rare-earth ions via non-radiative energy transfer (ET), placing them in an excited state, **4.** indicates that rare-earth ions emit light through radiative transitions.

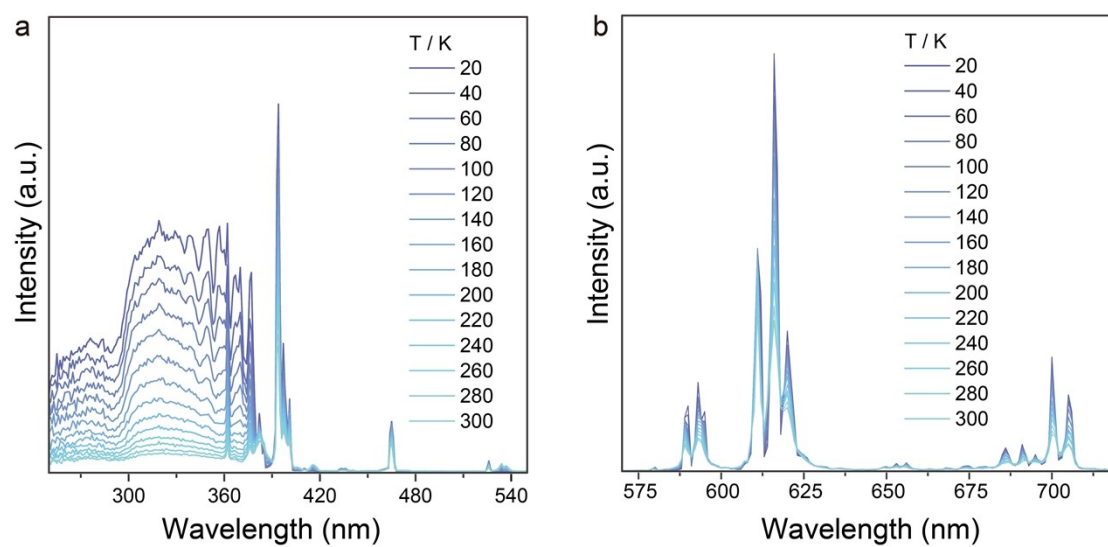

**Figure S9.** Variable-temperature spectroscopy testing from 20K to 300K. (a) Excitation spectrum of Eu-NC under emission at 616 nm. (b) Emission spectrum of Eu-NC under excitation at 319 nm.

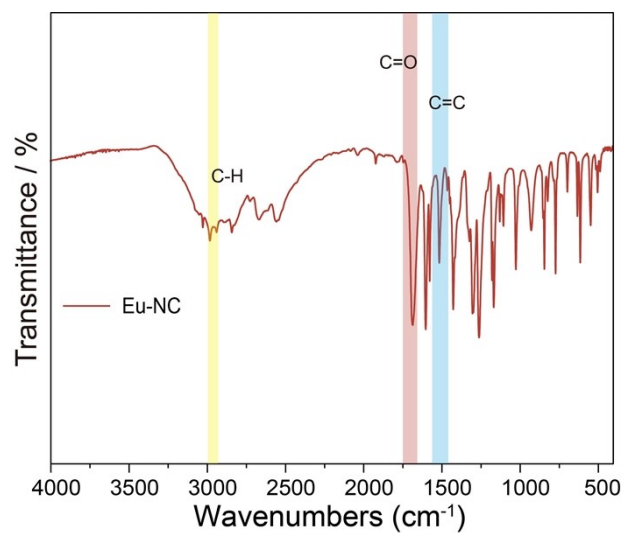

**Figure S10.** Infrared Spectra of Eu-NC among 500-4000 cm<sup>-1</sup>. The strong absorption bands from 1750 cm<sup>-1</sup> and 1620 cm<sup>-1</sup> were caused by the C=O, C=C vibration of MOBA. The absorption band at 2900 cm<sup>-1</sup> is caused by C-H vibrations.

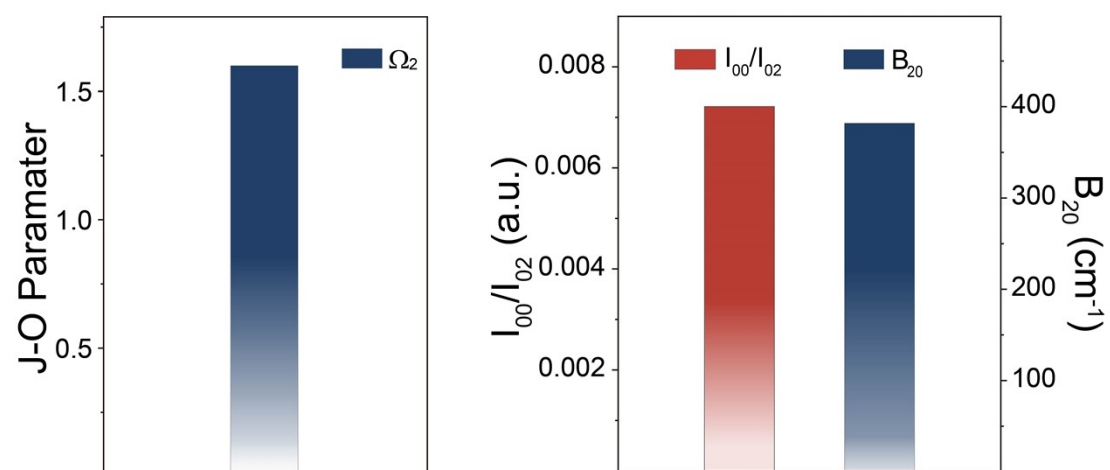

**Figure S11.** Judd-Ofelt intensity parameters  $\Omega_2$  of Eu-NC and the second-order crystal field parameter analysis for Eu-NC.

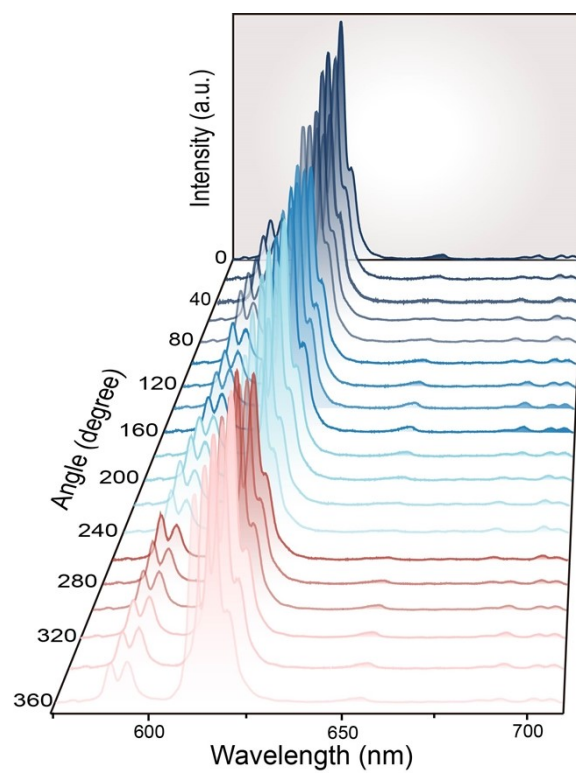

**Figure S12.** Polarized PL spectrum of Eu-NC microrod at variable angles (0~360°).

**Table S1.** Crystallographic data for compounds Eu-NC.

| Compound                            | Eu-NC                                            |
|-------------------------------------|--------------------------------------------------|
| Formula                             | C <sub>24</sub> H <sub>21</sub> EuO <sub>9</sub> |
| FW                                  | 605.37                                           |
| T/K                                 | 100                                              |
| Cry. system                         | monoclinic                                       |
| Space group                         | P2 <sub>1</sub> /c                               |
| a /Å                                | 13.40601(4)                                      |
| b /Å                                | 22.2215(4)                                       |
| c /Å                                | 7.6893(5)                                        |
| $\alpha$ /o                         | 90(2)                                            |
| $\beta$ /o                          | 104.4150(2)                                      |
| $\gamma$ /o                         | 90(3)                                            |
| V/Å <sup>3</sup>                    | 2218.54(17)                                      |
| Z                                   | 4                                                |
| Dc/g cm <sup>-3</sup>               | 1.812                                            |
| $\mu$ / mm <sup>-1</sup>            | 2.881                                            |
| Data/parameters                     | 5085/310                                         |
| 2 $\theta$ /o                       | 5.77-55.02                                       |
| F(000)                              | 1200.0                                           |
| GOF                                 | 1.127                                            |
| R1[ $I > 2\sigma(I)$ ] <sup>a</sup> | 0.0159                                           |
| wR2(All data) <sup>b</sup>          | 0.0373                                           |
